# Supplementary material
Source: PubMed Central journal article supplement (PMC3871197)

**A**

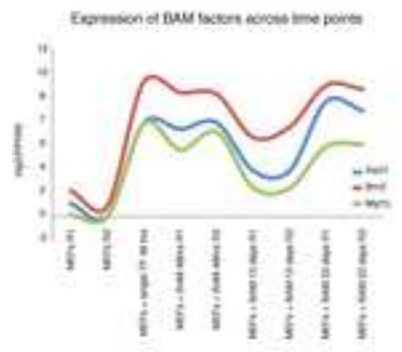

**B**

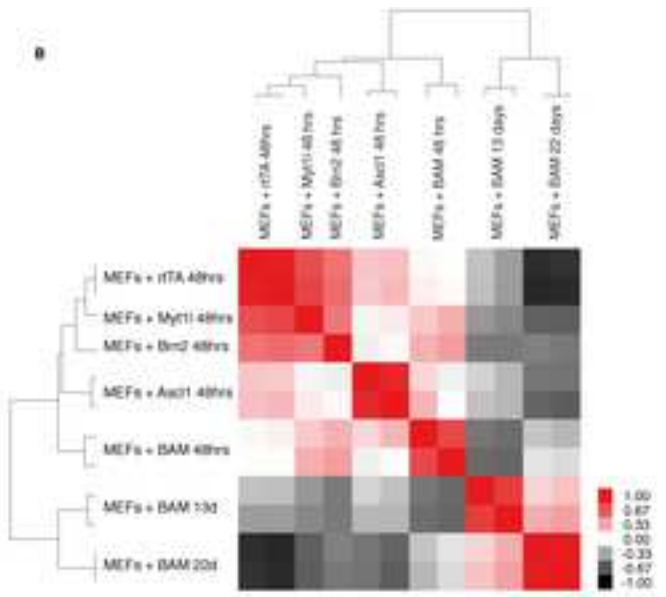

**C**

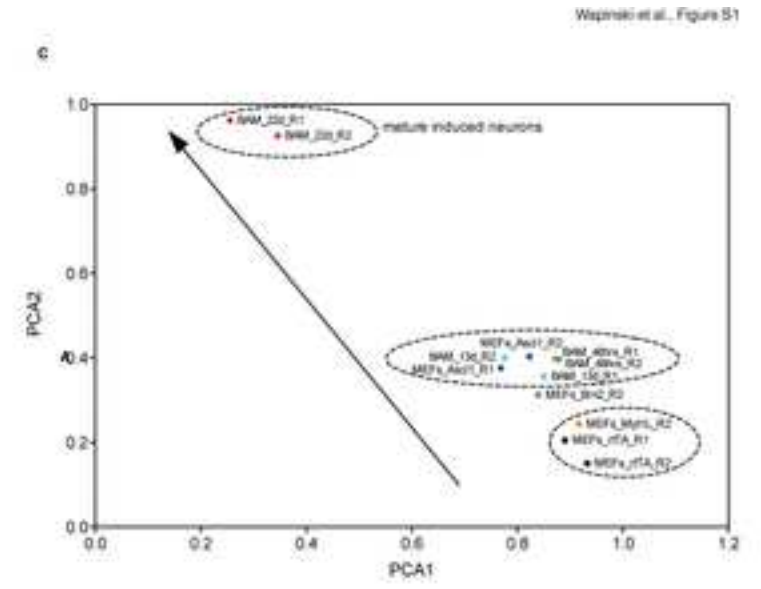

**A** BAM factors are chromatin associated

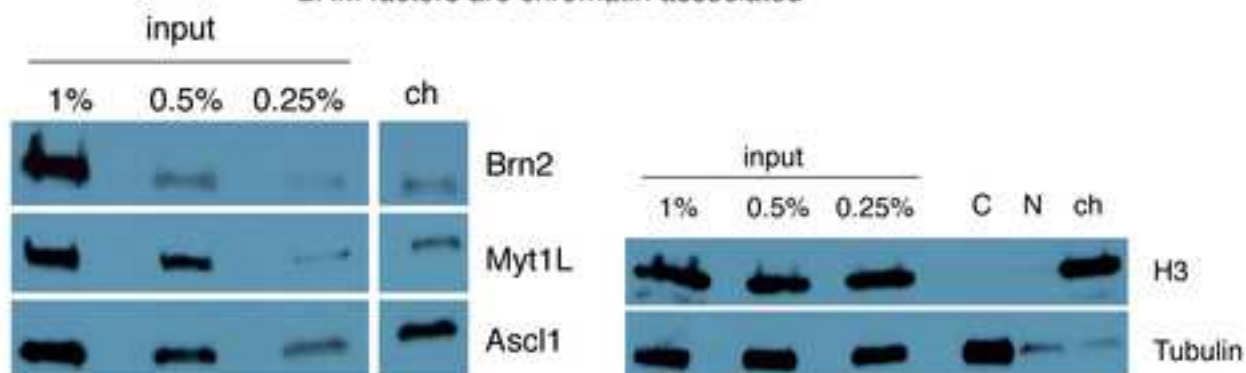

**B** Brn2 ChIPseq in BAM 48hrs cells

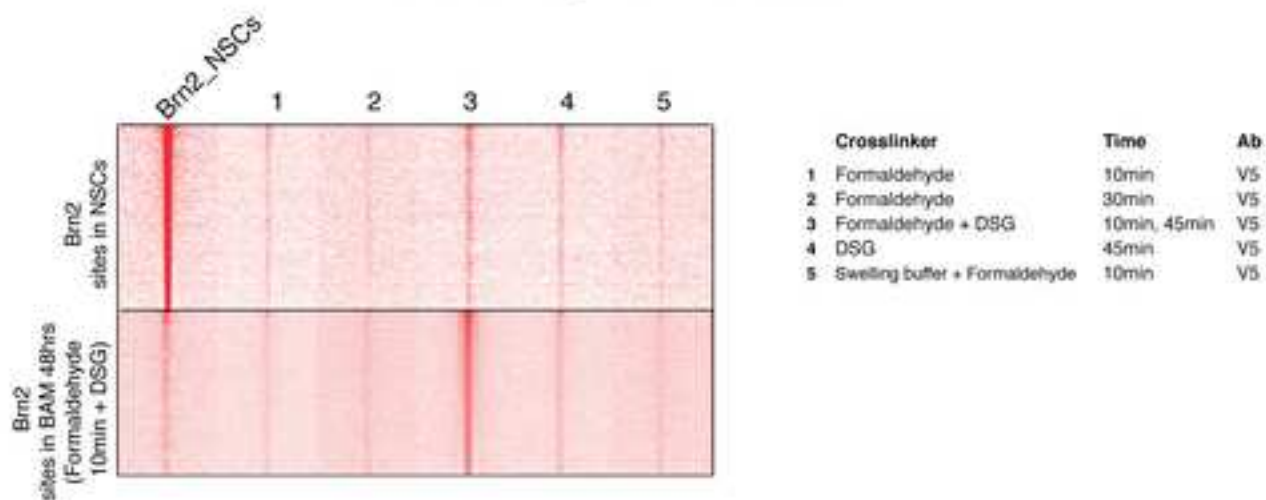

**C** Myt1L ChIPseq in BAM 48hrs cells

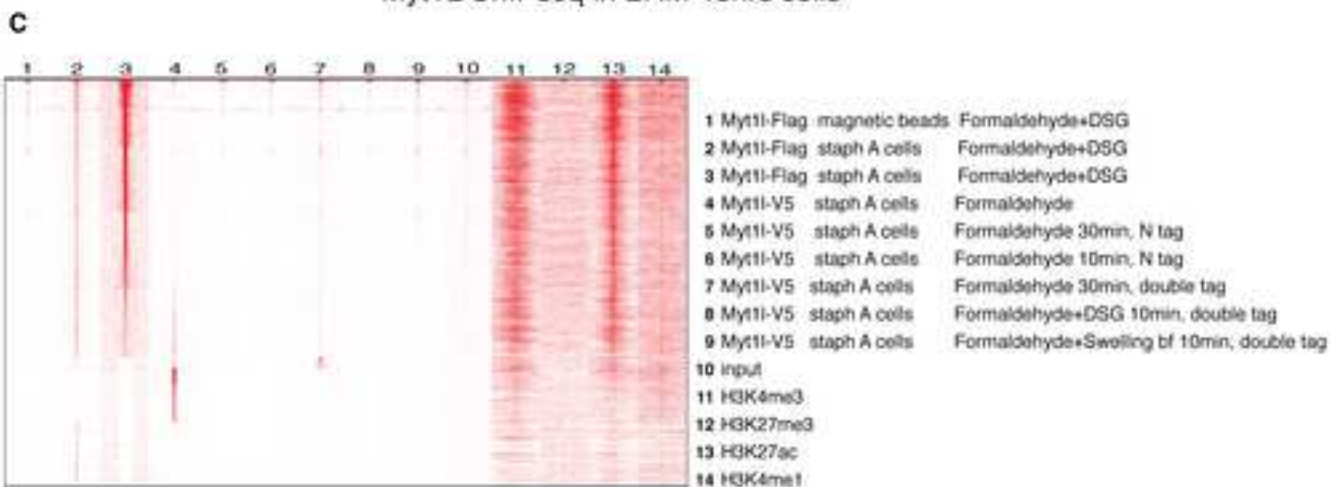

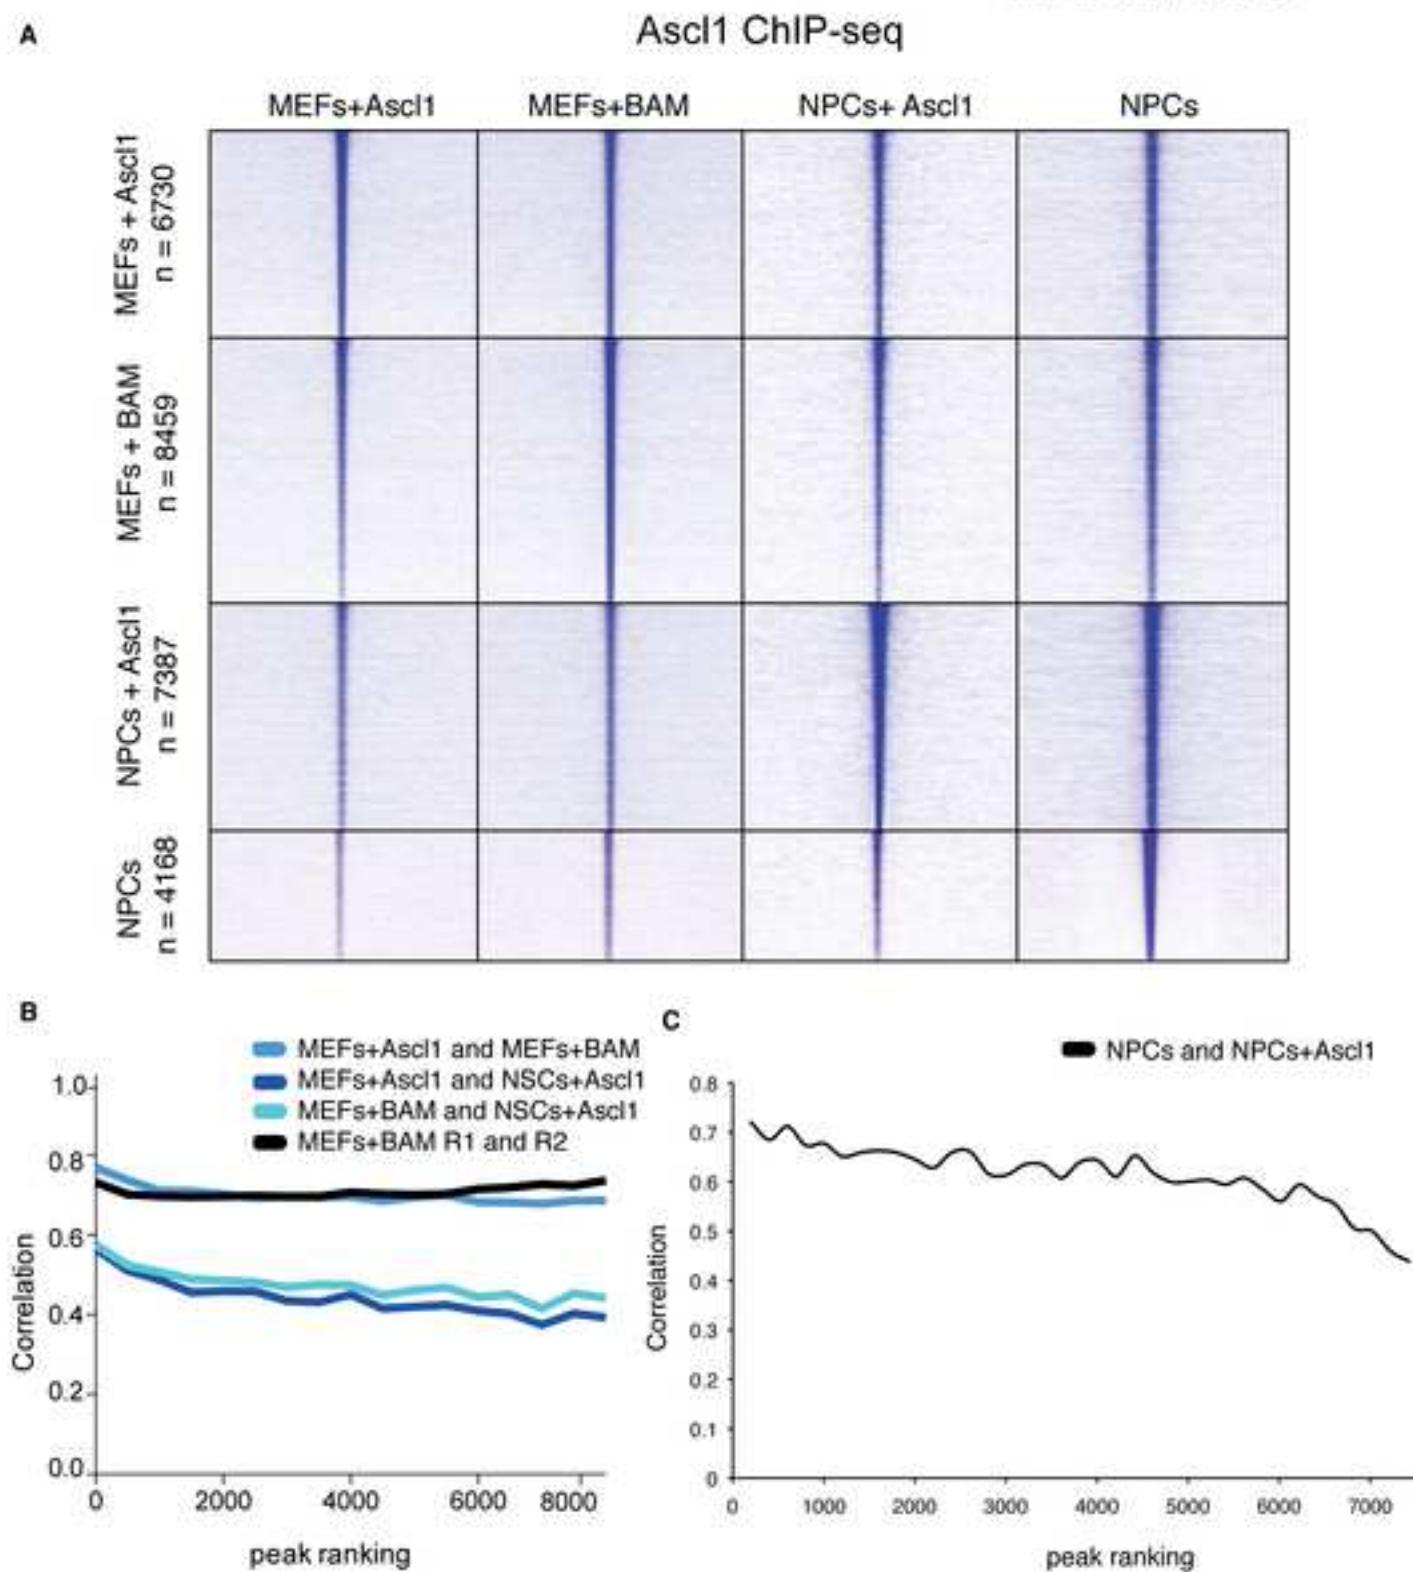

## Wapinski et al., Figure S4

**A** Distribution of Brn2 motif relative to Ascl1 motif in mouse genome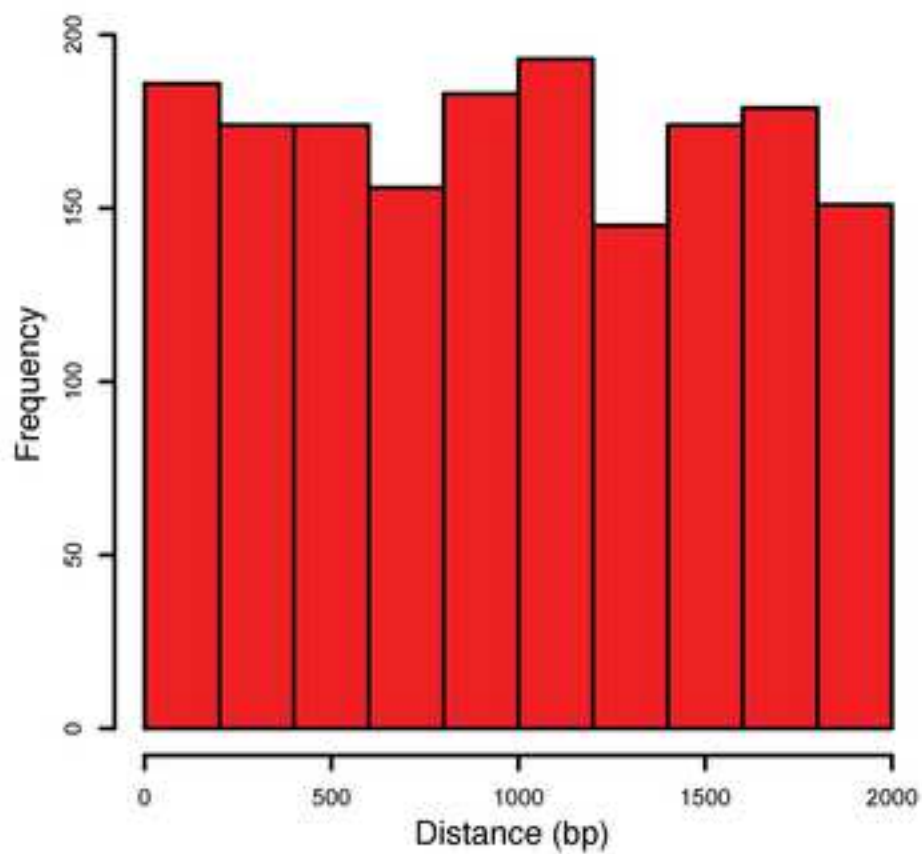**B**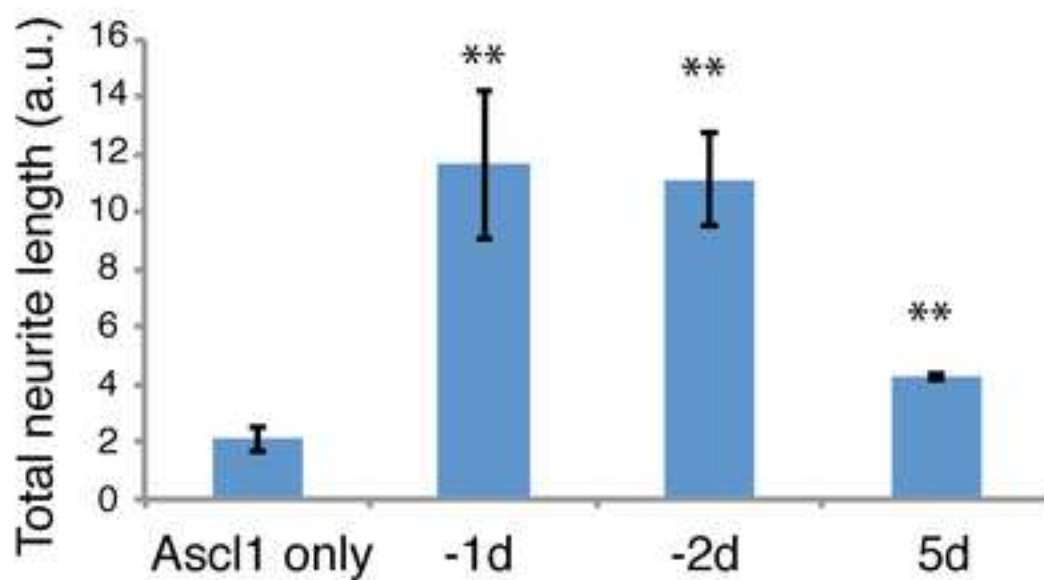

Wapinski et al., Figure S5

**A**

### MEFs nucleosome occupancy (predicted targets based on NPCs binding sites)

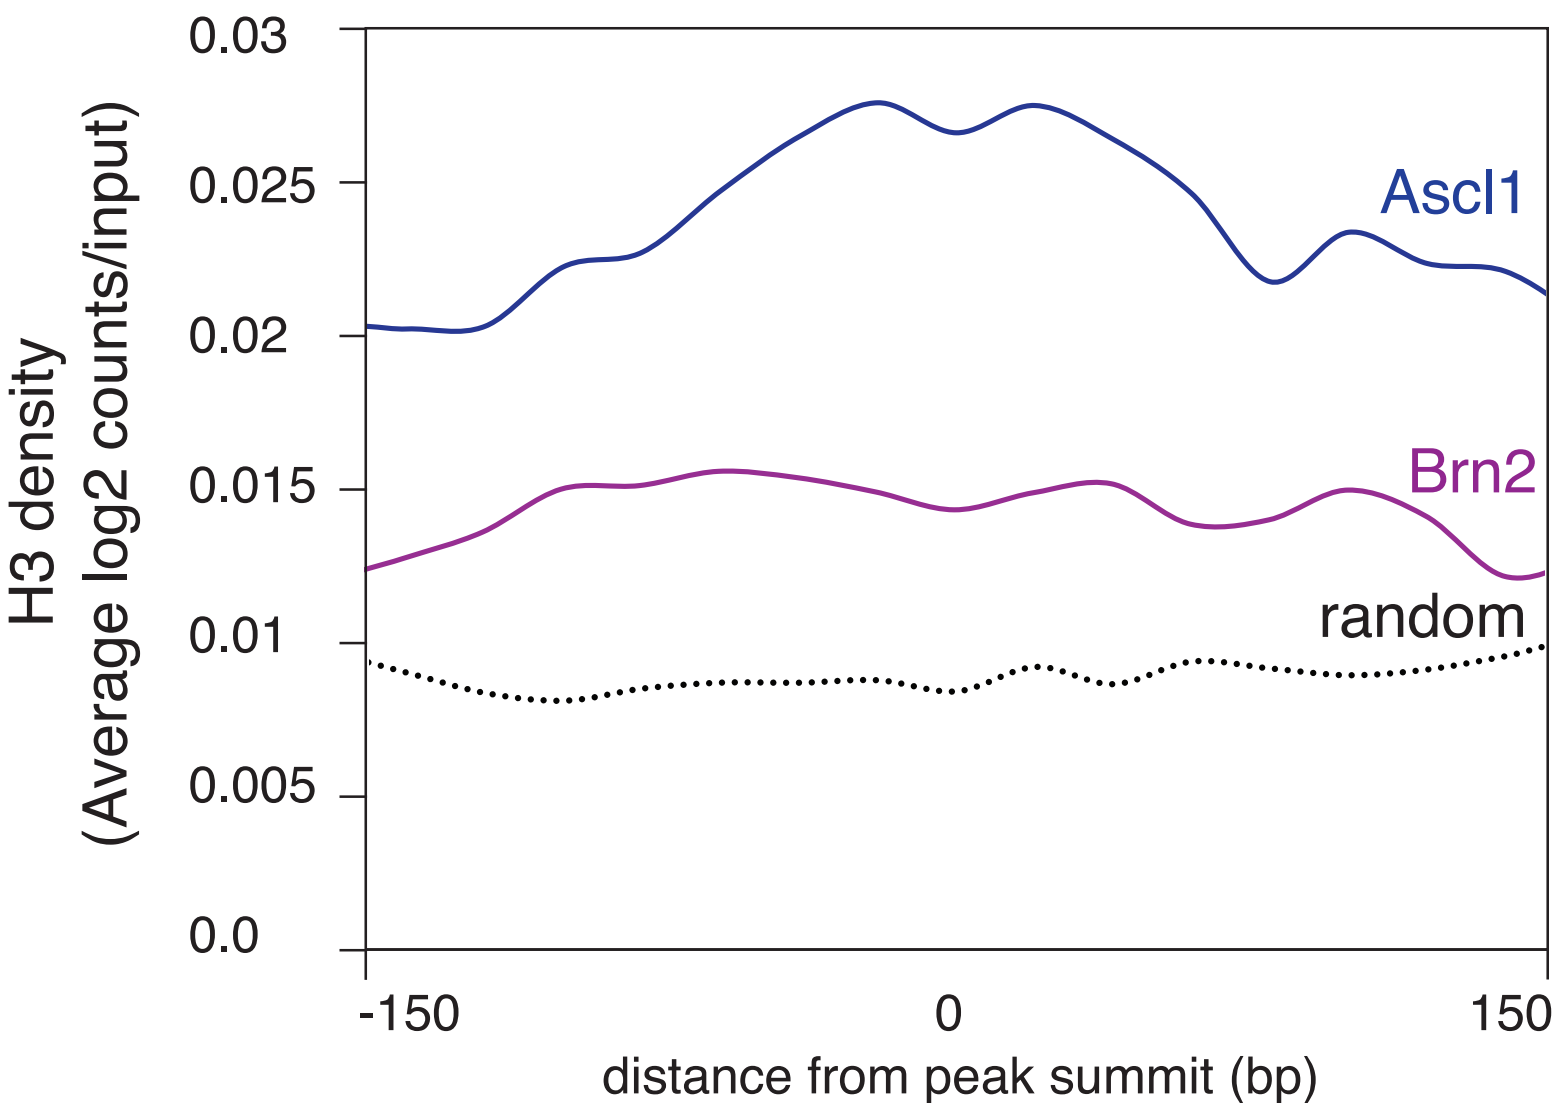

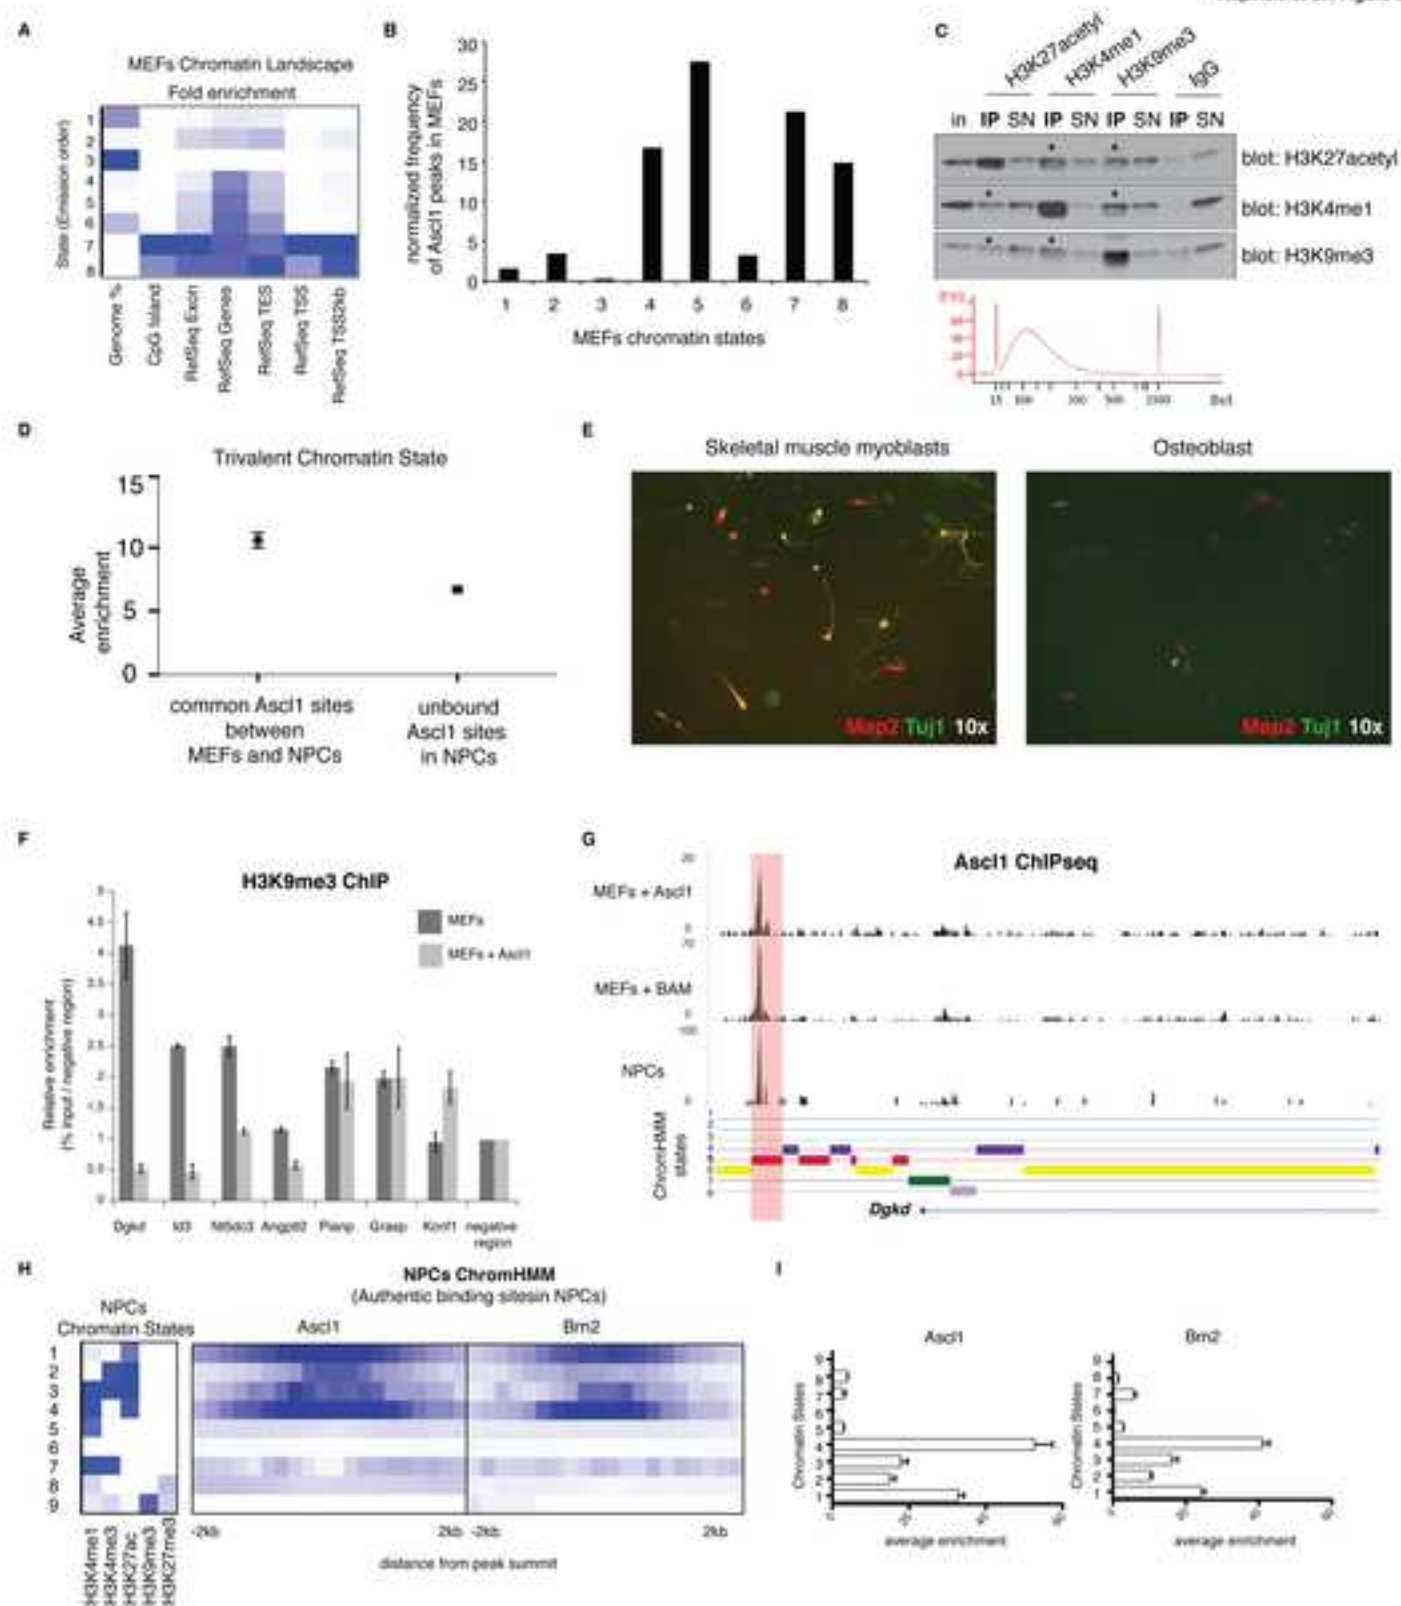

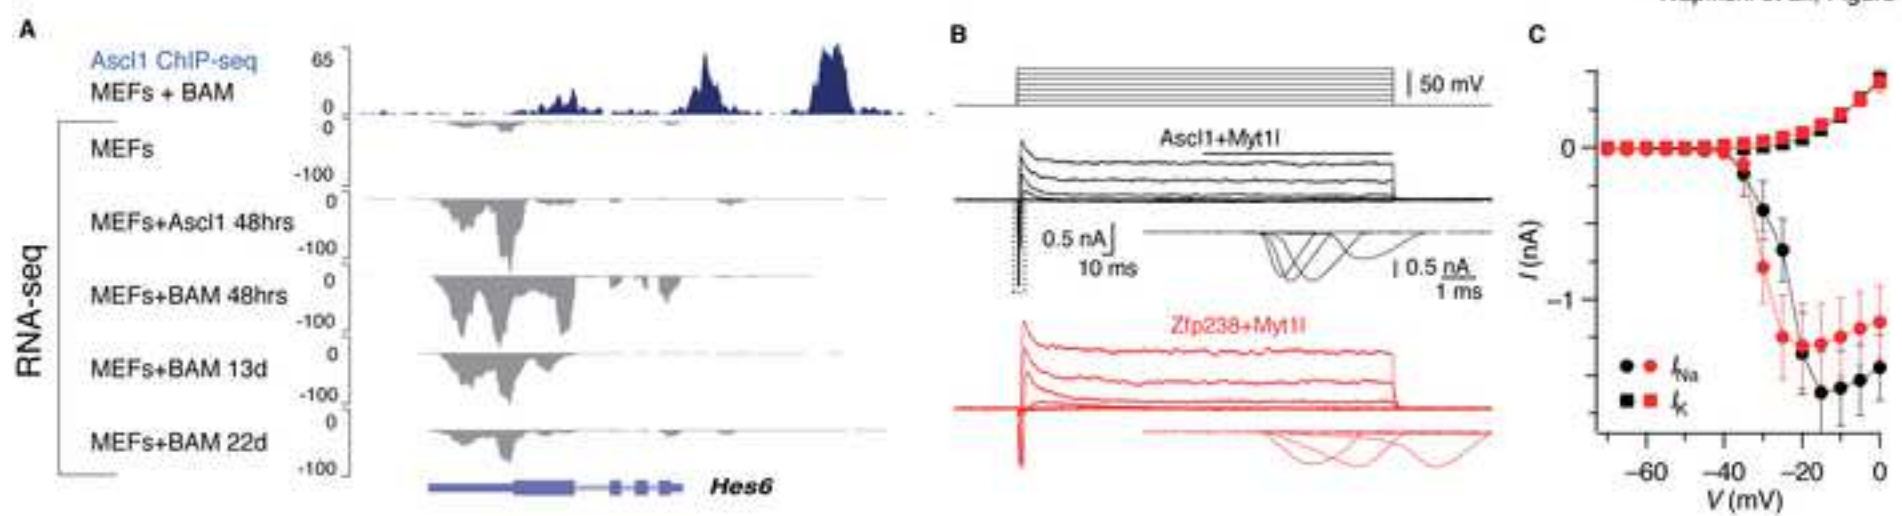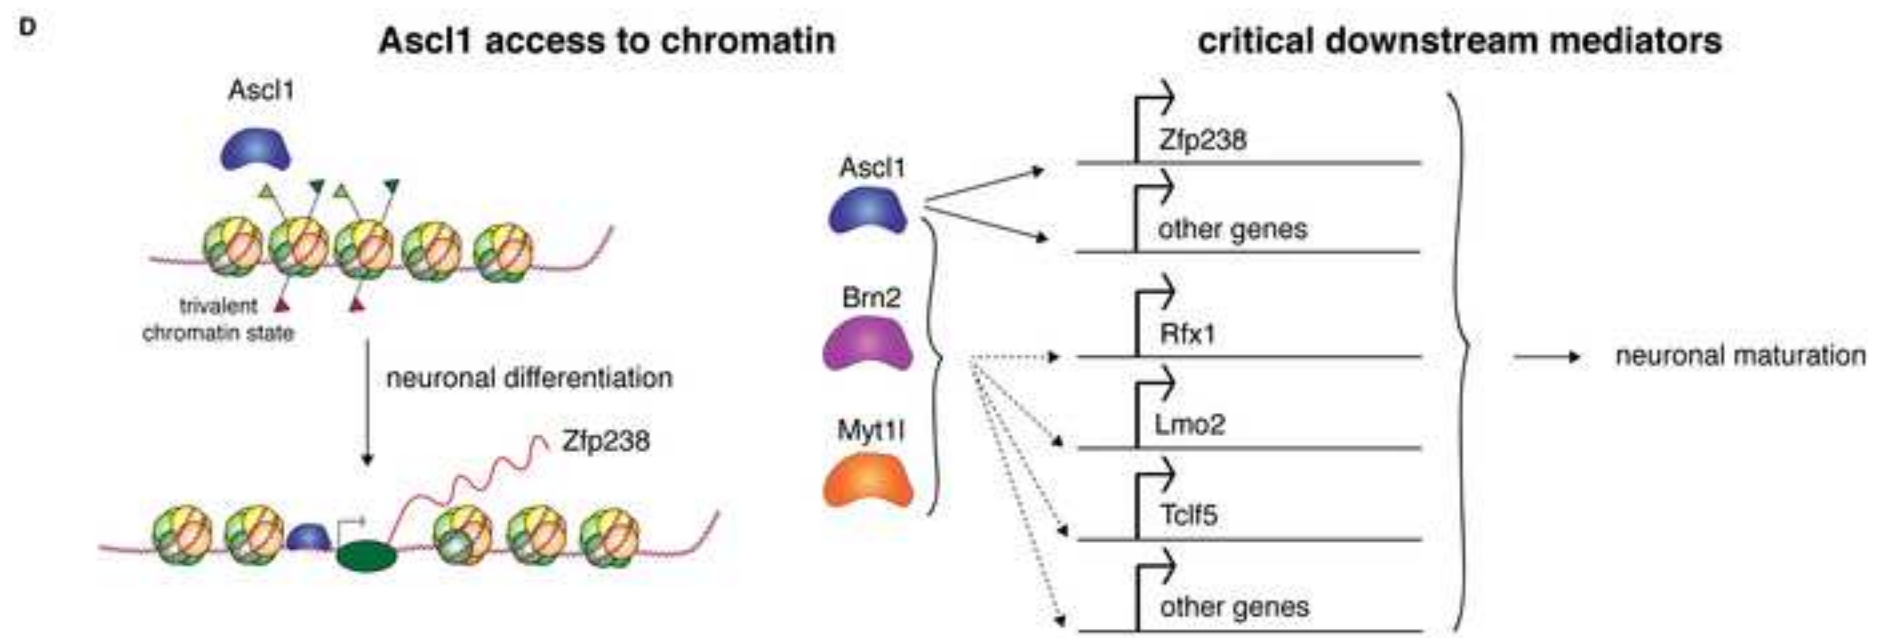

Supplement: NIHMS527061-supplement-02.pdf [file NIHMS527061-supplement-02.pdf]
